# Supplementary material for: Electrospun metal and metal alloy decorated TiO2 nanofiber photocatalysts for hydrogen generation
Source: Royal Society of Chemistry journal article supplement (doi:10.1039/c8ra04148b), 2018-01-01
Supplement: c8ra04148b1.pdf [file c8ra04148b1.pdf]

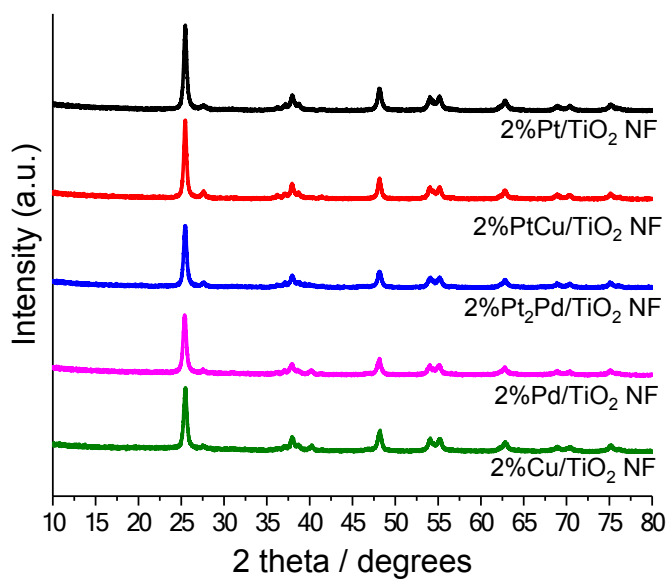

Fig. S1. PXRD patterns of 2% metal or metal alloy co-catalysts deposited TiO<sub>2</sub> nanofiber photocatalysts.

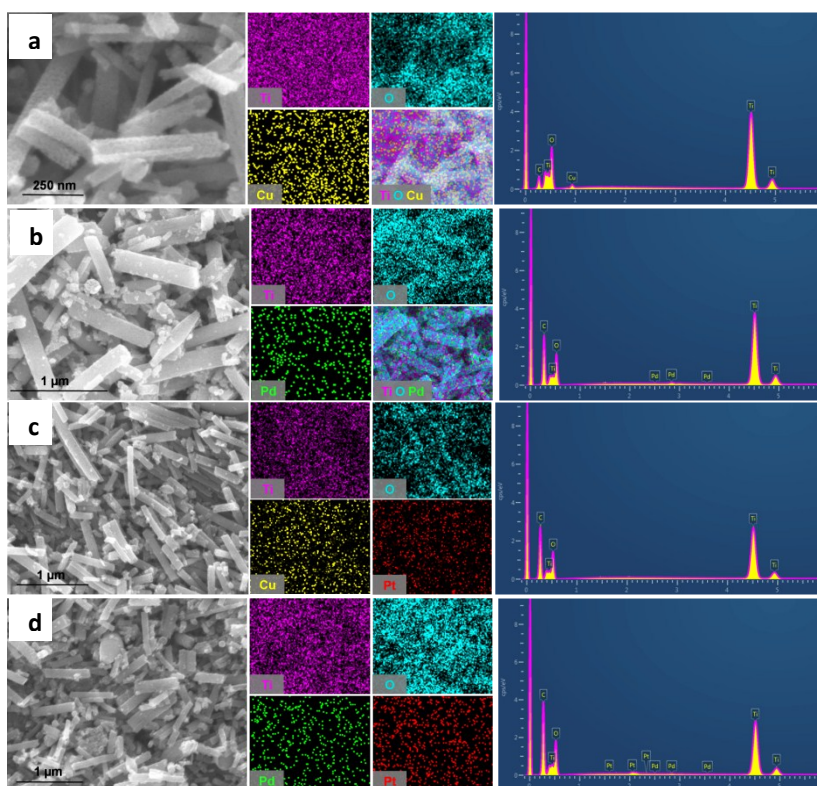

Fig. S2. Energy dispersive spectroscopy (EDS) elemental mapping and EDS spectra of (a) Cu/TiO<sub>2</sub>, (b) Pd/TiO<sub>2</sub>, (c) PtCu/TiO<sub>2</sub>, and Pt<sub>2</sub>Pd/TiO<sub>2</sub> nanofiber photocatalysts.

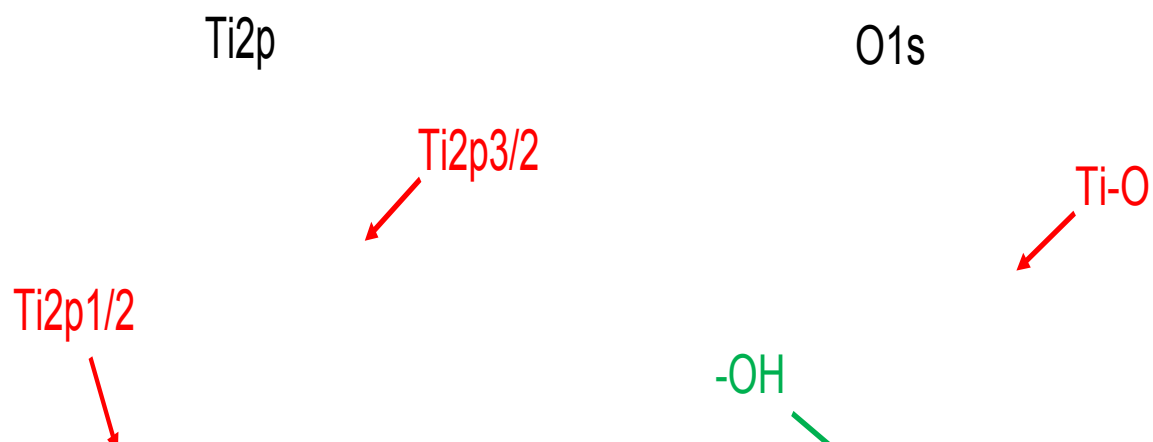

Fig. S3. XPS spectra of Ti and O peaks of Cu/TiO<sub>2</sub> nanofiber photocatalyst.
